# Supplementary material for: Comparative analysis of TTF‐1 binding DNA regions in small‐cell lung cancer and non‐small‐cell lung cancer
Source: PubMed Central journal article supplement (PMC6998394; doi:10.1002/1878-0261.12608), 2019-12-15
Supplement: MOL2-14-277-s005.pdf [file MOL2-14-277-s005.pdf]

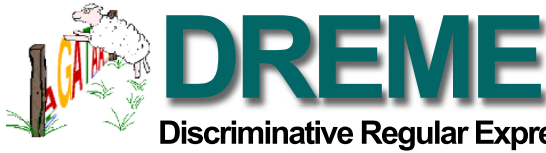

**DREME**  
Discriminative Regular Expression Motif Elicitation

For further information on how to interpret these results please access <http://meme-suite.org/>.

To get a copy of the MEME software please access <http://meme-suite.org>.

If you use DREME in your research please cite the following paper:

Timothy L. Bailey, "DREME: Motif discovery in transcription factor ChIP-seq data", *Bioinformatics*, 27(12):1653-1659, 2011. [\[full text\]](#)

- [DISCOVERED MOTIFS](#) | 
 [INPUTS & SETTINGS](#) | 
 [PROGRAM INFORMATION](#) | 
 [RESULTS IN TEXT FORMAT](#)
  
[RESULTS IN XML FORMAT](#)

**DISCOVERED MOTIFS**

[Next Top](#)

| Motif        | Logo | RC Logo | E-value  | Unersased E-value | More              | Submit/Dow        |
|--------------|------|---------|----------|-------------------|-------------------|-------------------|
| 1. CASCTGB   |      |         | 6.2e-433 | 6.2e-433          | <a href="#">↓</a> | <a href="#">→</a> |
| 2. TRTTTR    |      |         | 7.1e-119 | 9.2e-129          | <a href="#">↓</a> | <a href="#">→</a> |
| 3. CWCTYM    |      |         | 8.2e-053 | 6.0e-064          | <a href="#">↓</a> | <a href="#">→</a> |
| 4. CYCCDCCC  |      |         | 3.0e-033 | 5.4e-037          | <a href="#">↓</a> | <a href="#">→</a> |
| 5. GGAAA     |      |         | 2.0e-030 | 2.2e-034          | <a href="#">↓</a> | <a href="#">→</a> |
| 6. ATAAWR    |      |         | 2.4e-021 | 2.1e-029          | <a href="#">↓</a> | <a href="#">→</a> |
| 7. ACAAWRG   |      |         | 5.6e-014 | 3.1e-024          | <a href="#">↓</a> | <a href="#">→</a> |
| 8. GTAMTY    |      |         | 6.6e-013 | 1.4e-016          | <a href="#">↓</a> | <a href="#">→</a> |
| 9. CCCCRGGG  |      |         | 4.0e-012 | 2.6e-014          | <a href="#">↓</a> | <a href="#">→</a> |
| 10. CCATCTGB |      |         | 5.6e-009 | 8.7e-012          | <a href="#">↓</a> | <a href="#">→</a> |
| 11. CATTYA   |      |         | 2.6e-008 | 2.4e-012          | <a href="#">↓</a> | <a href="#">→</a> |

|     | Motif <a href="#">?</a> | Logo <a href="#">?</a> | RC Logo <a href="#">?</a> | E-value <a href="#">?</a> | Unersased E-value <a href="#">?</a> | More <a href="#">?</a> | Submit/Dow <a href="#">?</a> |
|-----|-------------------------|------------------------|---------------------------|---------------------------|-------------------------------------|------------------------|------------------------------|
| 12. | GRGAGR                  |                        |                           | 2.2e-008                  | 4.6e-033                            | <a href="#">↓</a>      | <a href="#">→</a>            |
| 13. | RTGASTCA                |                        |                           | 2.5e-007                  | 1.0e-010                            | <a href="#">↓</a>      | <a href="#">→</a>            |
| 14. | CACBTGA                 |                        |                           | 1.7e-007                  | 3.0e-010                            | <a href="#">↓</a>      | <a href="#">→</a>            |
| 15. | CVGGAA                  |                        |                           | 3.8e-005                  | 7.2e-030                            | <a href="#">↓</a>      | <a href="#">→</a>            |
| 16. | ACAAAGM                 |                        |                           | 8.4e-004                  | 2.9e-008                            | <a href="#">↓</a>      | <a href="#">→</a>            |
| 17. | DTACACA                 |                        |                           | 1.2e-003                  | 1.8e-017                            | <a href="#">↓</a>      | <a href="#">→</a>            |
| 18. | GAAAMC                  |                        |                           | 2.0e-003                  | 4.8e-013                            | <a href="#">↓</a>      | <a href="#">→</a>            |
| 19. | CCGTGW                  |                        |                           | 4.9e-003                  | 1.4e-006                            | <a href="#">↓</a>      | <a href="#">→</a>            |
| 20. | ACACACAS                |                        |                           | 3.3e-002                  | 8.9e-009                            | <a href="#">↓</a>      | <a href="#">→</a>            |
| 21. | CCTGRCAC                |                        |                           | 1.4e-002                  | 1.7e-008                            | <a href="#">↓</a>      | <a href="#">→</a>            |
| 22. | CACSTG                  |                        |                           | 4.5e-002                  | 4.1e-282                            | <a href="#">↓</a>      | <a href="#">→</a>            |

## INPUTS & SETTINGS

[Previous](#) [Next](#) [Top](#)

### Sequences

Source [?](#) [./seqs-centered](#)    Alphabet [?](#) [DNA](#)    Sequence Count [?](#) [5920](#)

### Control Sequences

Source [?](#) [./seqs-shuffled](#)    Sequence Count [?](#) [5920](#)

### Background

|                        |                       |   |   |   |                       |                        |
|------------------------|-----------------------|---|---|---|-----------------------|------------------------|
| Name <a href="#">?</a> | Bg. <a href="#">?</a> |   |   |   | Bg. <a href="#">?</a> | Name <a href="#">?</a> |
| Adenine                | 0.258                 | A | ~ | T | 0.259                 | Thymine                |
| Cytosine               | 0.241                 | C | ~ | G | 0.242                 | Guanine                |

### Other Settings

|                            |                                                             |
|----------------------------|-------------------------------------------------------------|
| <b>Strand Handling</b>     | Both the given and reverse complement strands are processed |
| <b># REs to Generalize</b> | 100                                                         |
| <b>Shuffle Seed</b>        | 1                                                           |
| <b>E-value Threshold</b>   | 0.05                                                        |
| <b>Max Motif Count</b>     | No maximum motif count.                                     |
| <b>Max Run Time</b>        | 5304 seconds.                                               |

[Previous Top](#)**DREME version**

5.0.5 (Release date: Mon Mar 18 20:12:19 2019 -0700)

**Reference**

Timothy L. Bailey, "DREME: Motif discovery in transcription factor ChIP-seq data", *Bioinformatics*, 27(12):1653-1659, 2011. [[full text](#)]

**Command line**

```
dreme -verbosity 1 -oc dreame_out -png -dna -p ./seqs-centered -n ./seqs-shuffled -t 5304 -e 0.05
```
